# Supplementary material for: Elucidating the promotion of Na2CO3 in CO2 capture by Li4SiO4
Source: Royal Society of Chemistry journal article supplement (doi:10.1039/d1cp04507e), 2021-01-01
Supplement: d1cp04507e1.pdf [file d1cp04507e1.pdf]

## Elucidating the promotion of $\text{Na}_2\text{CO}_3$ in $\text{CO}_2$ capture by $\text{Li}_4\text{SiO}_4$

Zhen Wang<sup>a</sup>, Qian Xu<sup>\*a</sup>, Kun Peng<sup>a</sup>, Zirui Wang<sup>b</sup>, Xingli Zou<sup>a</sup>, Hongwei Cheng<sup>a</sup>, Xionggang Lu<sup>a</sup>

<sup>a</sup> The State Key Laboratory of Advanced Special Steel,

Shanghai Key Laboratory of Advanced Ferrometallurgy,

School of Materials Science and Engineering, Shanghai University, Shanghai 200072, P. R. China;

<sup>b</sup> Shanghai Institute of Applied Physics, Chinese Academy of Sciences, Shanghai, 201800, China

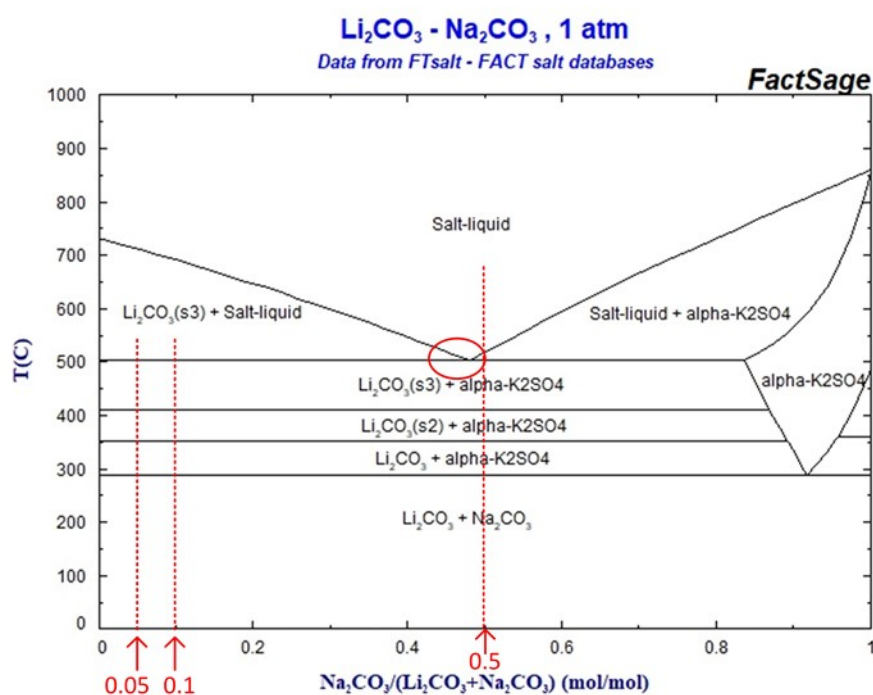

Fig. S1 Phase diagram of  $\text{Li}_2\text{CO}_3\text{-K}_2\text{CO}_3$  system from FTsalt-FACT salt databases (FactSage<sup>TM</sup>, 2021).

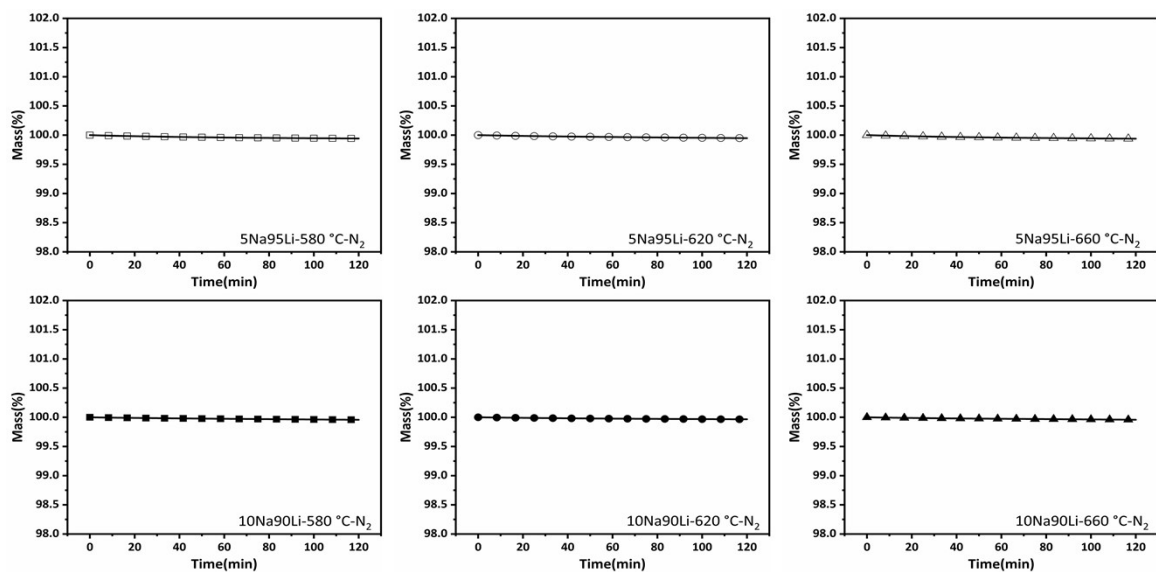

Fig. S2 Isothermal analysis of  $\text{Na}_2\text{CO}_3$  and  $\text{Li}_4\text{SiO}_4$  with different molar ratios in the 100% $\text{N}_2$  atmosphere at different temperatures.
